# Supplementary material for: Analysis of Reservoir Seismic Law Based on Three-Dimensional Morphological Characteristics of Joint Surface Related to Listric Fault
Source: Frontiers journal article supplement (doi:10.3389/fphy.2021.811609), 2022-01-05
Supplement: Data_Sheet_1.xlsx [file Data_Sheet_1.xlsx]

## Sheet: Sheet1
Changing rate of parameter	changing rate (%)
	0-day	10-day	30-day	60-day	90-day
Sq(Concave&0MPa)	0.21	100.15	67.62	-5.87	26.5
Sa(Concave&0MPa)	3.78	77.42	101.2	17.87	18.82
Smc(Concave&0MPa)	3.48	18.86	26.49	58.26	27.66
Sal(Concave&0MPa)	-0.24	155.84	-11.11	-9.17	-0.15
Sq(Concave&20MPa)	1.29	-21	129.94	-8.74	28.32
Sa(Concave&20MPa)	9.2	-42.96	117.31	-15.51	18.72
Smc(Concave&20MPa)	18.9	-45.19	73.09	-46.76	32.13
Sal(Concave&20MPa)	4.35	-27.96	-11.32	19.02	-14.12
Sq(Convex&0MPa)	-24.06	1.03	2.4	-1.69	-20.65
Sa(Convex&0MPa)	-20.11	12.51	5.55	-9.81	-15.3
Smc(Convex&0MPa)	-29.41	-3.61	38.84	-37.14	-18.71
Sal(Convex&0MPa)	0.4	21.29	-1.25	-6.55	0.81
Sq(Convex&20MPa)	-2.87	35.52	21.86	2.31	21.33
Sa(Convex&20MPa)	-0.61	36.85	25.94	2.45	26.33
Smc(Convex&20MPa)	2.79	38.44	38.07	5.65	9.25
Sal(Convex&20MPa)	-2.86	-22.93	-1.51	1.47	3.94
	Triaxial compressive strength(MPa)
	Fracture water pressure
soaking time(d)	0MPa	20MPa
0	289.755	266.489
10	334.656	290.015
30	288.29	262.372
60	316.045	265.712
90	320.576	282.99
